# Supplementary material
Source: PubMed Central journal article supplement (PMC6103818)
Supplement: NIHMS978674-supplement-1.pdf [file NIHMS978674-supplement-1.pdf]

## SUPPLEMENTAL FIGURES

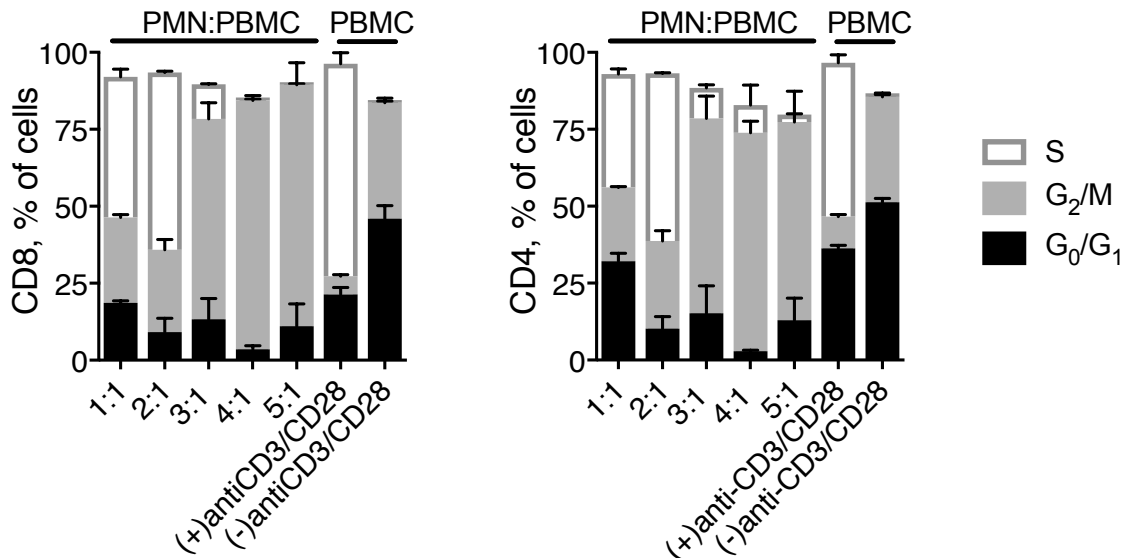

**Figure S1. Co-incubation of PMN with T cells increases the fraction of G<sub>2</sub>/M<sup>+</sup> T cells.** PBMC from healthy donors activated with or without anti-CD3/CD28 were co-cultured with fixed PMN at the indicated ratio for 3 days. Bromodeoxyuridine (BrdU) was added to the co-culture for an additional 16 hours. Cells were labeled with anti-BrdU, 7-AAD, anti-CD4 and anti-CD8 and analyzed by flow cytometry. Cell cycle of T cells was gated into S, G<sub>0</sub>/G<sub>1</sub>, and G<sub>2</sub>/M phases using a two dimensional BrdU vs 7-AAD dot plot. Error bars represent mean ± SEM. Results are representative of two different donors performed in duplicate.

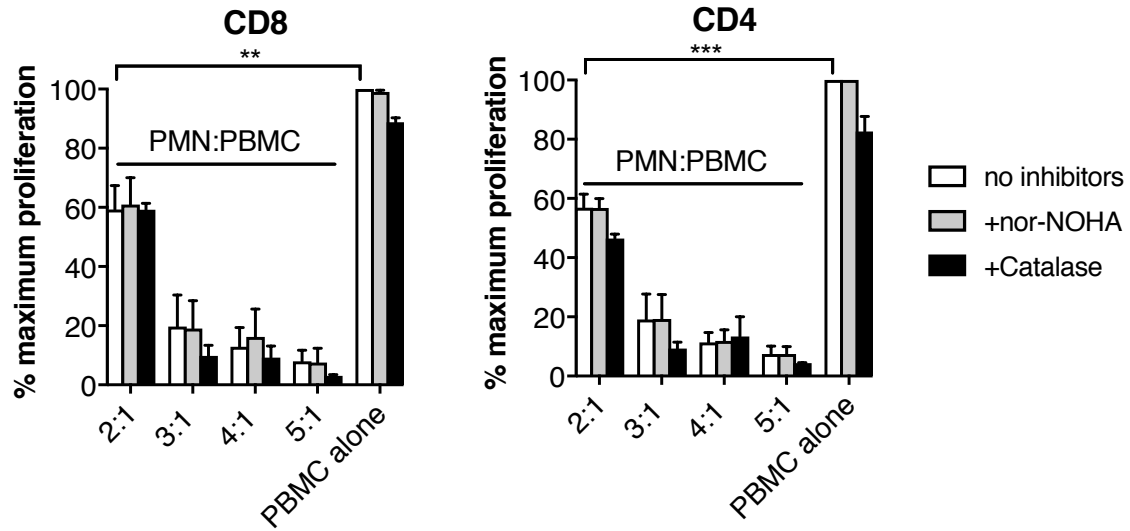

**Figure S2. PMN-mediated inhibition of T cell proliferation is independent of ROS and L-arginine.** CFSE-labeled PBMC stimulated with anti-CD3/CD28 mAbs were co-cultured with unfixed PMN in the presence or absence of nor-NOHA or catalase for 5 days at the indicated ratio. Results are normalized to the proliferation rates measured in control conditions (PBMC with anti-CD3/CD28 as 100%). Data from three different donors ( $n=3$ ) are expressed as mean  $\pm$  SEM.

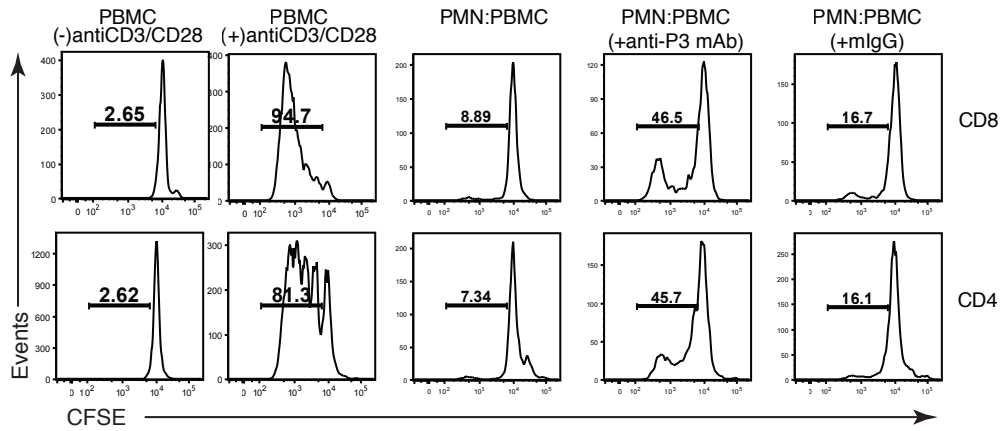

**Figure S3. PMN-mediated T cell inhibition is prevented by anti-P3 blocking antibody.** CFSE-labeled PBMC stimulated with anti-CD3/CD28 mAbs were co-cultured with fixed PMN at 3:1 ratio of PMN: PBMC. Representative plots of five different donors are shown.

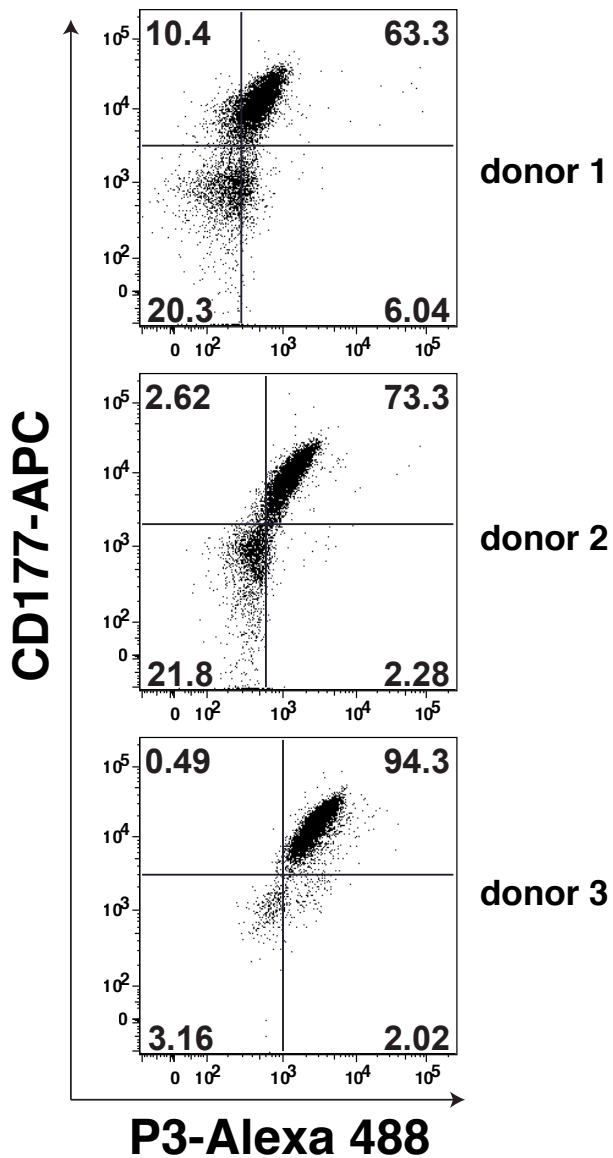

**Figure S4. mP3 and CD177 are co-localized on the same subset of resting PMN.** Flow cytometry was performed on purified PMN. PMN were stained with anti-CD16, anti-CD177, and anti-P3 antibodies. Dead cells were excluded by using Aqua staining. Gating was done on CD16<sup>+</sup> PMN. The figure represents three different donors with different proportions of mP3/CD177 expressing neutrophils.
